# Supplementary material for: Randomized phase II study of preoperative afatinib in untreated head and neck cancers: predictive and pharmacodynamic biomarkers of activity
Source: PubMed Central journal article supplement (PMC10728082; doi:10.1038/s41598-023-49887-4), 2023-12-18

# All patients (N=56)

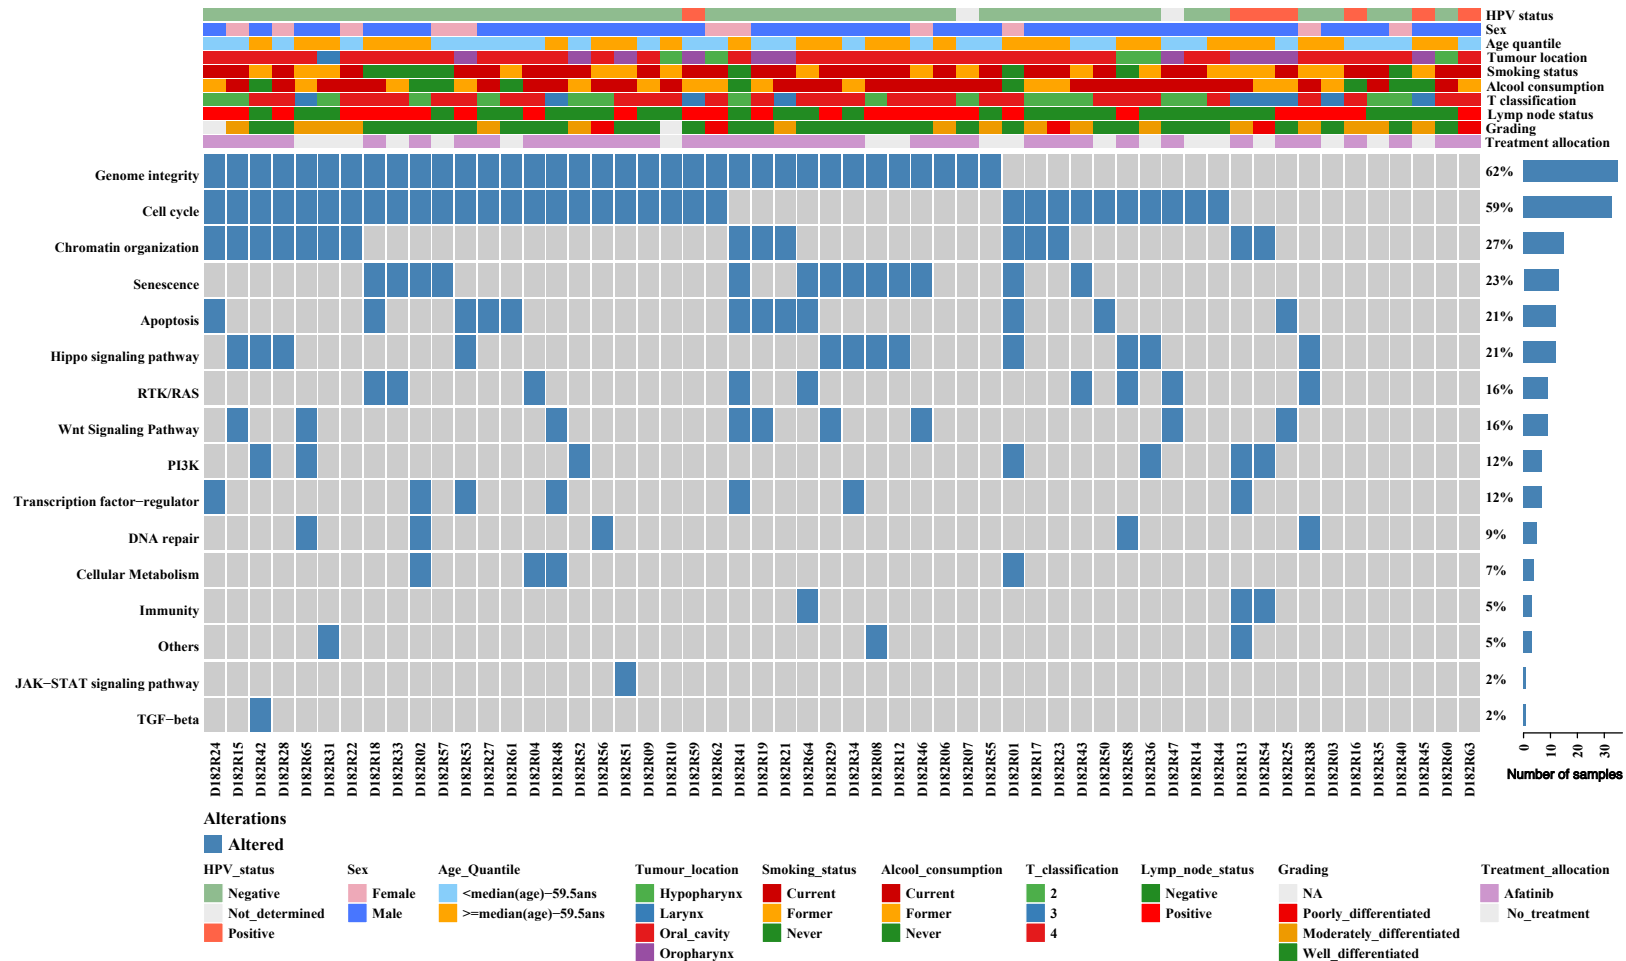

Supplement: 41598_2023_49887_MOESM2_ESM.pdf [file 41598_2023_49887_MOESM2_ESM.pdf]
