# Supplementary material for: Randomized phase II study of preoperative afatinib in untreated head and neck cancers: predictive and pharmacodynamic biomarkers of activity
Source: PubMed Central journal article supplement (PMC10728082; doi:10.1038/s41598-023-49887-4), 2023-12-18
Supplement: 41598_2023_49887_MOESM5_ESM.pdf [file 41598_2023_49887_MOESM5_ESM.pdf]

Supplementary Figure 4A

Rate of overall survival (%)

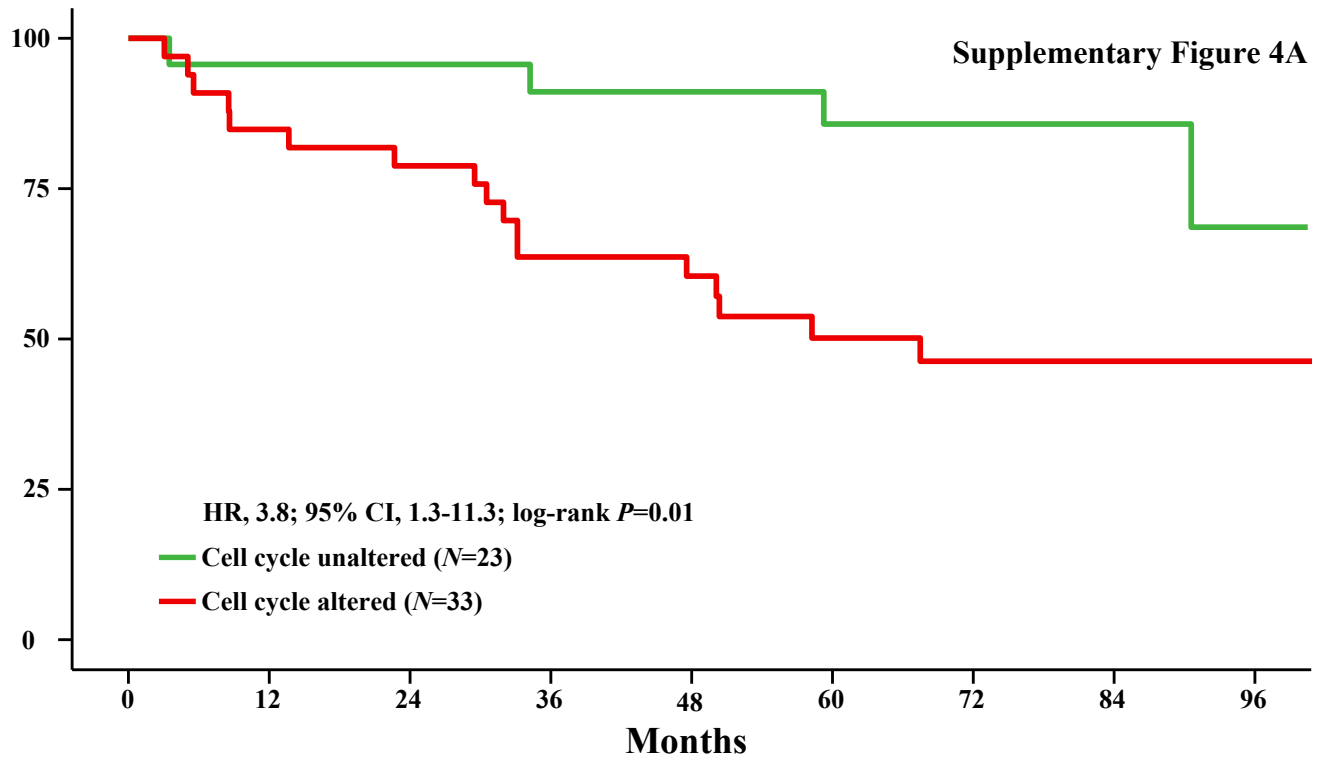

Number at risk

|                      |    |    |    |    |    |    |    |    |   |
|----------------------|----|----|----|----|----|----|----|----|---|
| Cell cycle unaltered | 23 | 22 | 21 | 20 | 17 | 16 | 15 | 11 | 2 |
| Cell cycle altered   | 33 | 28 | 26 | 21 | 19 | 13 | 11 | 6  | 1 |

Cumulative number of censoring

|                      |   |   |   |   |   |   |   |    |    |
|----------------------|---|---|---|---|---|---|---|----|----|
| Cell cycle unaltered | 0 | 0 | 1 | 1 | 4 | 4 | 5 | 9  | 17 |
| Cell cycle altered   | 0 | 0 | 0 | 0 | 1 | 4 | 5 | 10 | 15 |
