# Supplementary material for: Randomized phase II study of preoperative afatinib in untreated head and neck cancers: predictive and pharmacodynamic biomarkers of activity
Source: PubMed Central journal article supplement (PMC10728082; doi:10.1038/s41598-023-49887-4), 2023-12-18
Supplement: 41598_2023_49887_MOESM6_ESM.pdf [file 41598_2023_49887_MOESM6_ESM.pdf]

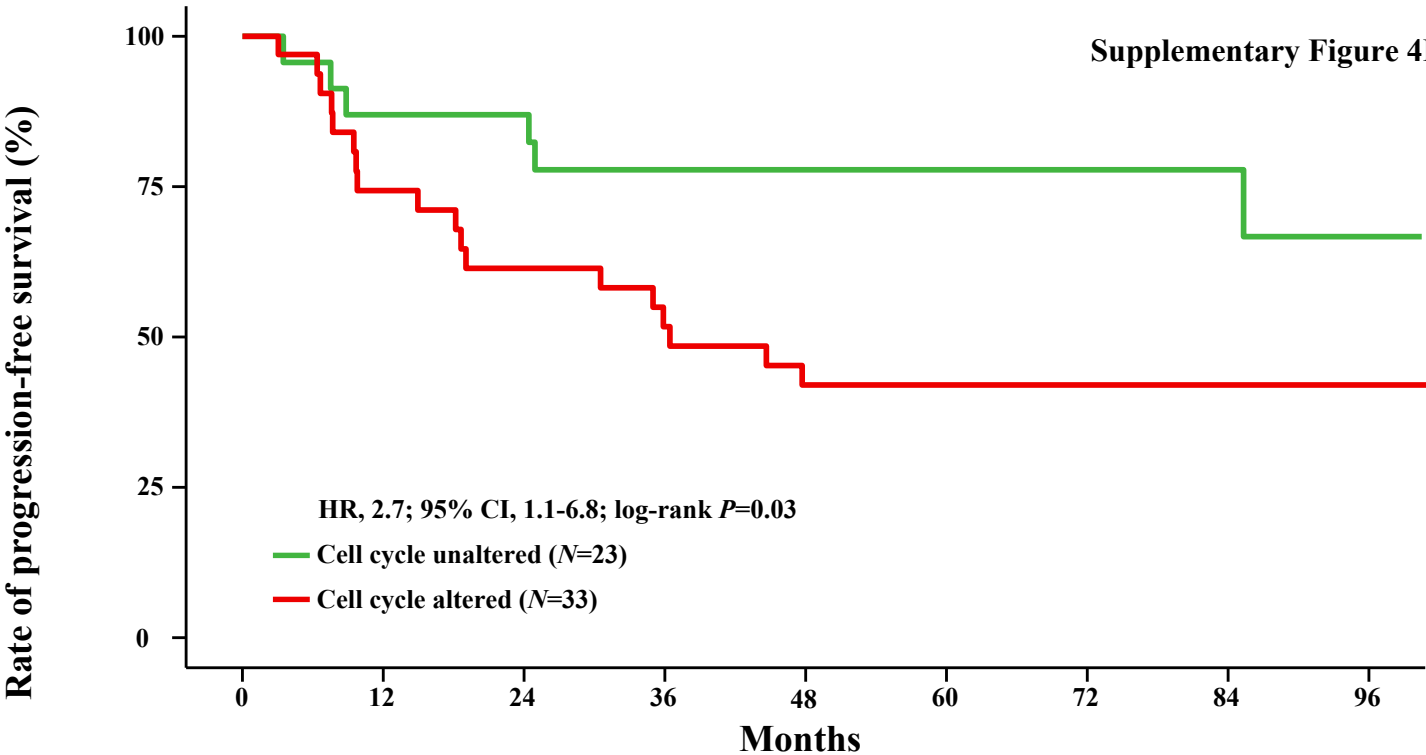

Number at risk

|                      |    |    |    |    |    |    |    |   |   |
|----------------------|----|----|----|----|----|----|----|---|---|
| Cell cycle unaltered | 23 | 20 | 19 | 16 | 13 | 13 | 12 | 9 | 2 |
| Cell cycle altered   | 33 | 23 | 19 | 16 | 13 | 9  | 7  | 3 | 1 |

Cumulative number of censoring

|                      |   |   |   |   |   |   |   |    |    |
|----------------------|---|---|---|---|---|---|---|----|----|
| Cell cycle unaltered | 0 | 0 | 1 | 2 | 5 | 5 | 6 | 9  | 15 |
| Cell cycle altered   | 0 | 2 | 2 | 2 | 2 | 6 | 8 | 12 | 14 |
