# Supplementary material for: Randomized phase II study of preoperative afatinib in untreated head and neck cancers: predictive and pharmacodynamic biomarkers of activity
Source: PubMed Central journal article supplement (PMC10728082; doi:10.1038/s41598-023-49887-4), 2023-12-18
Supplement: 41598_2023_49887_MOESM8_ESM.pdf [file 41598_2023_49887_MOESM8_ESM.pdf]

Supplementary Figure 5B

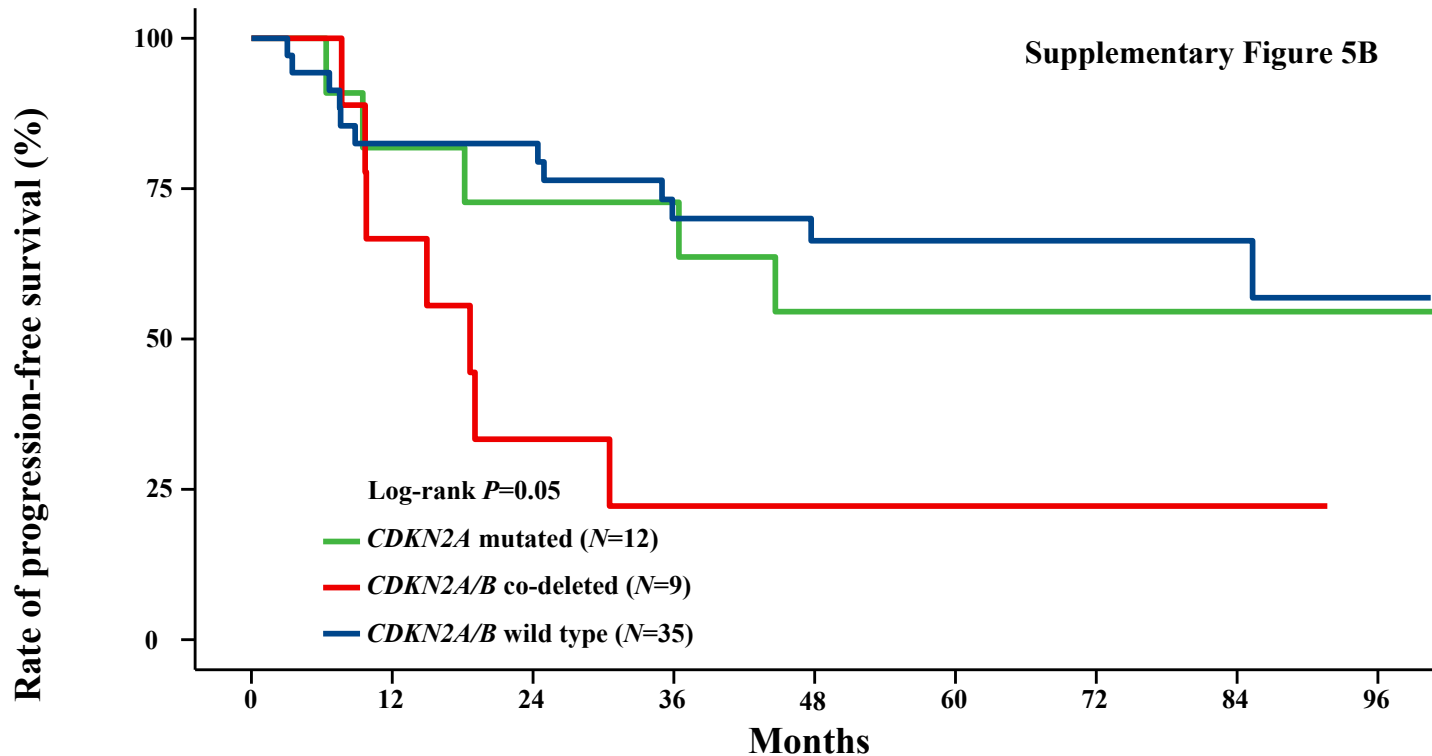

Number at risk

|                            | 0  | 12 | 24 | 36 | 48 | 60 | 72 | 84 | 96 |
|----------------------------|----|----|----|----|----|----|----|----|----|
| <i>CDKN2A</i> mutated      | 12 | 9  | 8  | 8  | 6  | 4  | 3  | 2  | 1  |
| <i>CDKN2A/B</i> co-deleted | 9  | 6  | 3  | 2  | 2  | 1  | 1  | 1  | 0  |
| <i>CDKN2A/B</i> wild type  | 35 | 28 | 27 | 22 | 18 | 17 | 15 | 9  | 2  |

Cumulative number of censoring

|                            |   |   |   |   |   |   |   |    |    |
|----------------------------|---|---|---|---|---|---|---|----|----|
| <i>CDKN2A</i> mutated      | 0 | 1 | 1 | 1 | 1 | 3 | 4 | 5  | 6  |
| <i>CDKN2A/B</i> co-deleted | 0 | 0 | 0 | 0 | 0 | 1 | 1 | 1  | 2  |
| <i>CDKN2A/B</i> wild type  | 0 | 1 | 2 | 3 | 6 | 7 | 9 | 15 | 21 |
