# Supplementary material for: Randomized phase II study of preoperative afatinib in untreated head and neck cancers: predictive and pharmacodynamic biomarkers of activity
Source: PubMed Central journal article supplement (PMC10728082; doi:10.1038/s41598-023-49887-4), 2023-12-18
Supplement: 41598_2023_49887_MOESM9_ESM.pdf [file 41598_2023_49887_MOESM9_ESM.pdf]

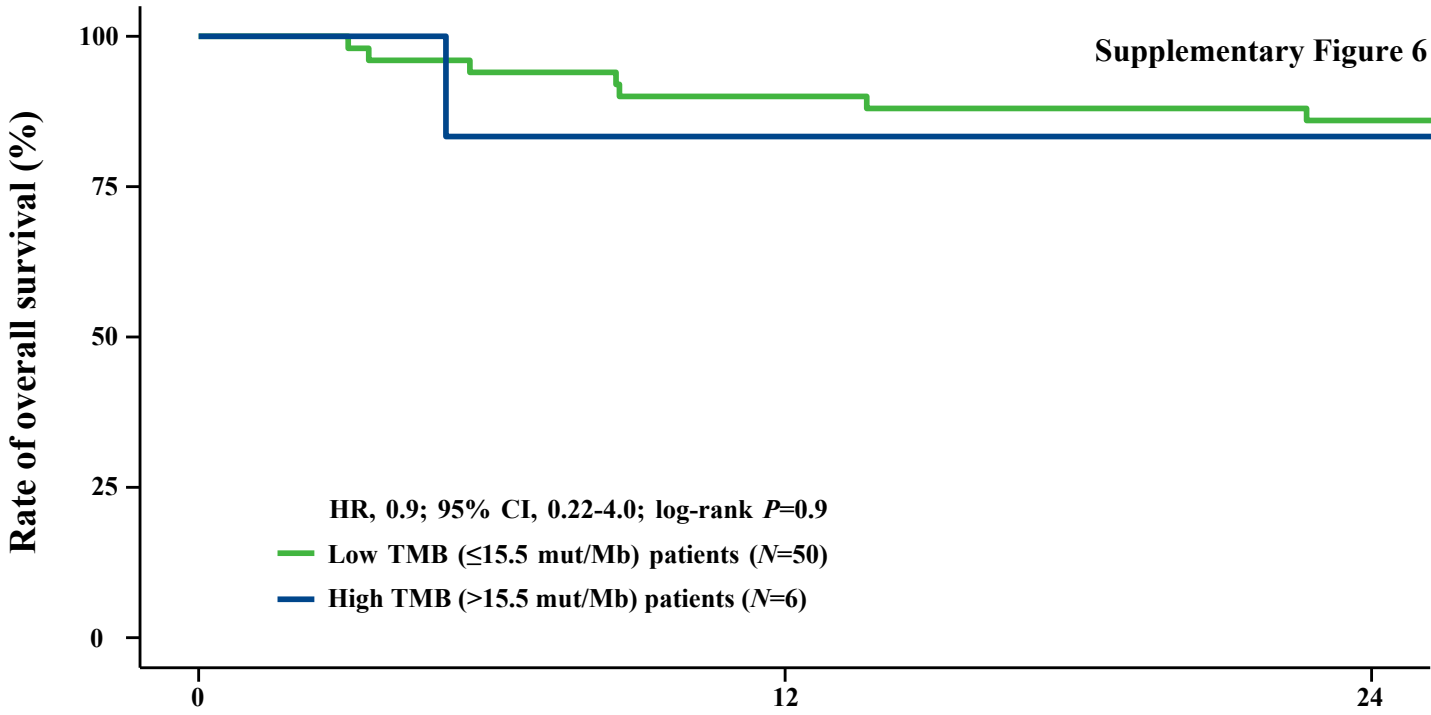

|                                       | 0  | 12 | 24 |
|---------------------------------------|----|----|----|
| Low TMB patients                      | 50 | 45 | 42 |
| High TMB patients                     | 6  | 5  | 5  |
| <b>Cumulative number of censoring</b> |    |    |    |
| Low TMB patients                      | 0  | 0  | 1  |
| High TMB patients                     | 0  | 0  | 0  |
