# Supplementary material for: Randomized phase II study of preoperative afatinib in untreated head and neck cancers: predictive and pharmacodynamic biomarkers of activity
Source: PubMed Central journal article supplement (PMC10728082; doi:10.1038/s41598-023-49887-4), 2023-12-18
Supplement: 41598_2023_49887_MOESM11_ESM.pdf [file 41598_2023_49887_MOESM11_ESM.pdf]

Supplementary Figure 8A

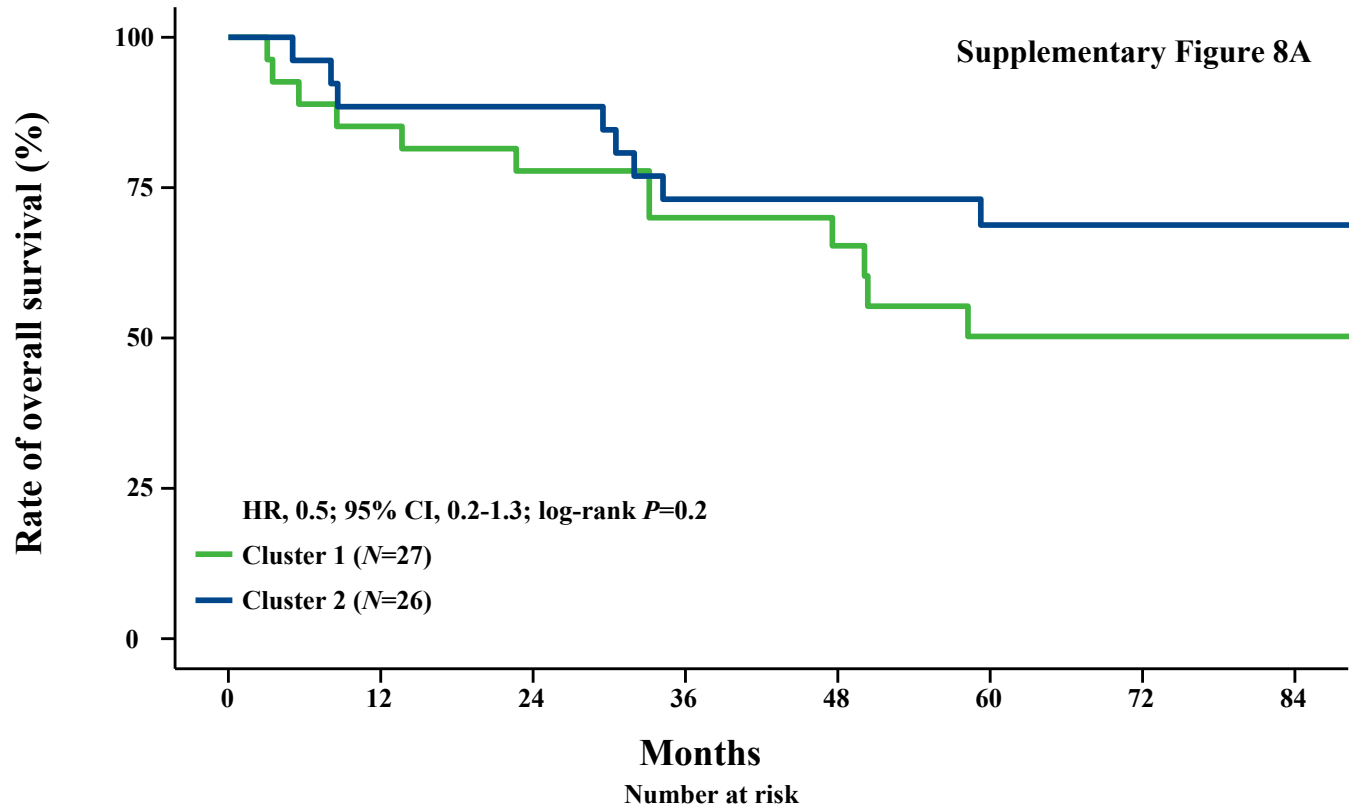

|                                | 0  | 12 | 24 | 36 | 48 | 60 | 72 | 84 |
|--------------------------------|----|----|----|----|----|----|----|----|
| Cluster 1                      | 27 | 23 | 20 | 18 | 14 | 9  | 8  | 7  |
| Cluster 2                      | 26 | 23 | 23 | 19 | 18 | 16 | 14 | 8  |
| Cumulative number of censoring |    |    |    |    |    |    |    |    |
| Cluster 1                      | 0  | 0  | 1  | 1  | 4  | 6  | 7  | 8  |
| Cluster 2                      | 0  | 0  | 0  | 0  | 1  | 2  | 4  | 10 |
