# Supplementary material for: Randomized phase II study of preoperative afatinib in untreated head and neck cancers: predictive and pharmacodynamic biomarkers of activity
Source: PubMed Central journal article supplement (PMC10728082; doi:10.1038/s41598-023-49887-4), 2023-12-18
Supplement: 41598_2023_49887_MOESM12_ESM.pdf [file 41598_2023_49887_MOESM12_ESM.pdf]

Supplementary Figure 8B

Rate of progression-free survival (%)

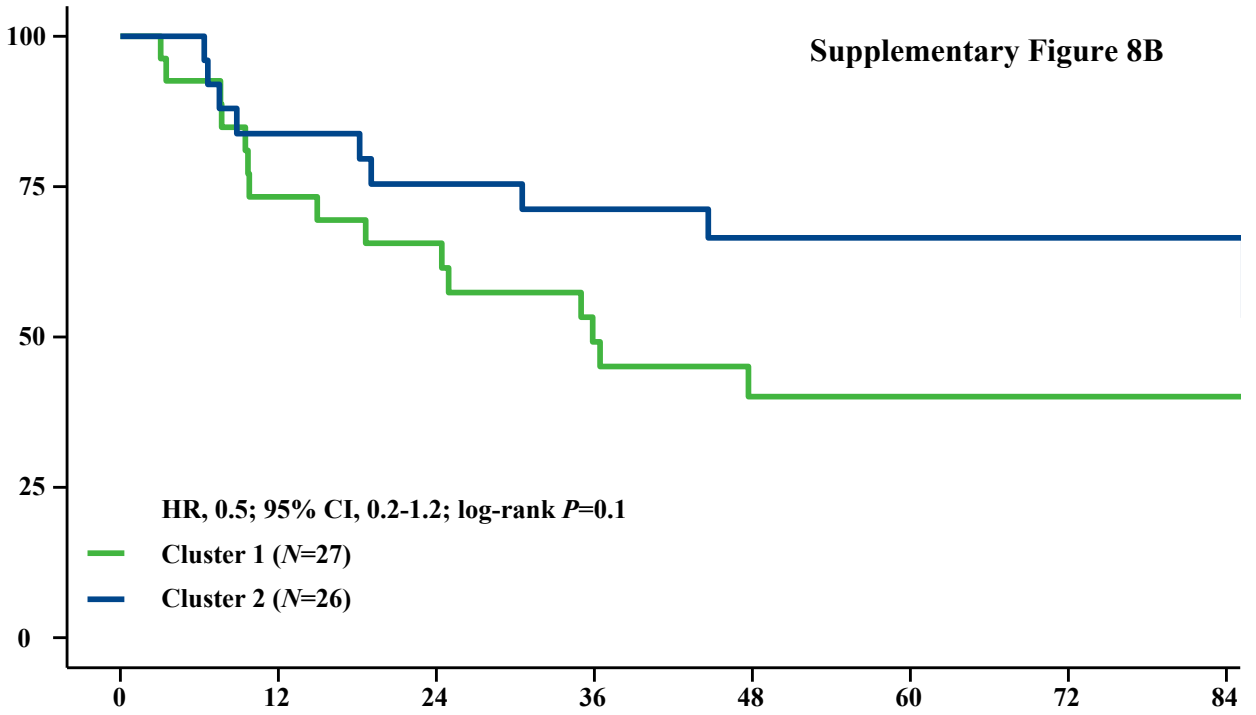

Months  
Number at risk

|           |    |    |    |    |    |    |    |   |
|-----------|----|----|----|----|----|----|----|---|
| Cluster 1 | 27 | 19 | 16 | 12 | 8  | 5  | 4  | 3 |
| Cluster 2 | 26 | 20 | 18 | 16 | 14 | 13 | 11 | 7 |

Cumulative number of censoring

|           |   |   |   |   |   |   |   |    |
|-----------|---|---|---|---|---|---|---|----|
| Cluster 1 | 0 | 1 | 2 | 2 | 4 | 7 | 8 | 9  |
| Cluster 2 | 0 | 2 | 2 | 3 | 4 | 5 | 7 | 11 |
