# Supplementary material for: Randomized phase II study of preoperative afatinib in untreated head and neck cancers: predictive and pharmacodynamic biomarkers of activity
Source: PubMed Central journal article supplement (PMC10728082; doi:10.1038/s41598-023-49887-4), 2023-12-18
Supplement: 41598_2023_49887_MOESM14_ESM.pdf [file 41598_2023_49887_MOESM14_ESM.pdf]

# Raw data quality control

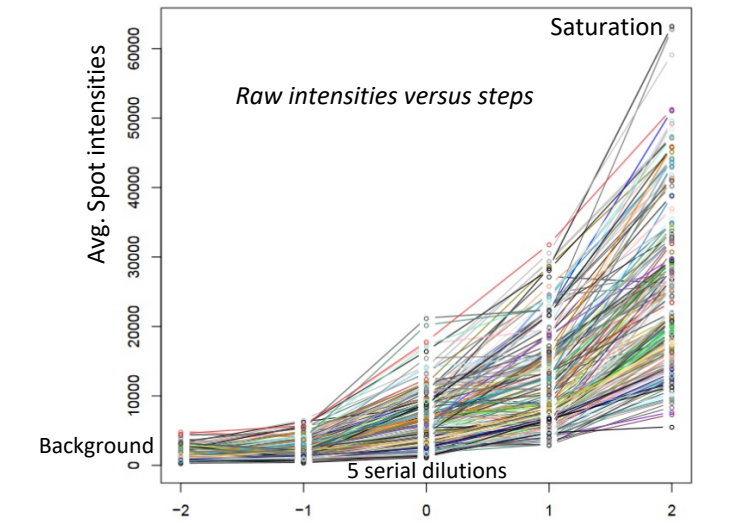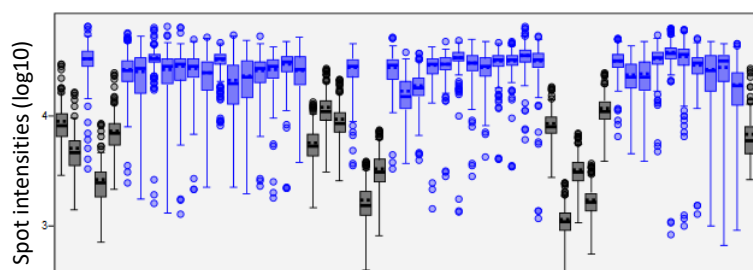

Control Rabbit [IR-40-800 #0005971]  
 Control Rabbit [IR-20-800 #0005971]  
 FAK [15a # IR-20-800 #0005971]  
 Control Rabbit [IR-10-800 #0005971]  
 Control Rabbit [IR-30-800 #0005971]  
 AMPK [Wt # IR-20-800 #0005972]  
 AMPK [K61 # IR-20-800 #0005972]  
 Akt [Ser181] [754 # IR-20-800 #0005973]  
 Akt [Ser181] [308 # IR-20-800 #0005974]  
 Akt [Ser181] [138 # IR-20-800 #0005975]  
 Akt [Ser181] [104b # IR-20-800 #0005976]  
 Akt [Ser181] [104c # IR-20-800 #0005977]  
 Akt [Ser181] [104d # IR-20-800 #0005978]  
 Akt [Ser181] [104e # IR-20-800 #0005979]  
 Akt [Ser181] [104f # IR-20-800 #0005980]  
 Akt [Ser181] [104g # IR-20-800 #0005981]  
 Akt [Ser181] [104h # IR-20-800 #0005982]  
 Akt [Ser181] [104i # IR-20-800 #0005983]  
 Akt [Ser181] [104j # IR-20-800 #0005984]  
 Akt [Ser181] [104k # IR-20-800 #0005985]  
 Akt [Ser181] [104l # IR-20-800 #0005986]  
 Akt [Ser181] [104m # IR-20-800 #0005987]  
 Akt [Ser181] [104n # IR-20-800 #0005988]  
 Akt [Ser181] [104o # IR-20-800 #0005989]  
 Akt [Ser181] [104p # IR-20-800 #0005990]  
 Akt [Ser181] [104q # IR-20-800 #0005991]  
 Akt [Ser181] [104r # IR-20-800 #0005992]  
 Akt [Ser181] [104s # IR-20-800 #0005993]  
 Akt [Ser181] [104t # IR-20-800 #0005994]  
 Akt [Ser181] [104u # IR-20-800 #0005995]  
 Akt [Ser181] [104v # IR-20-800 #0005996]  
 Akt [Ser181] [104w # IR-20-800 #0005997]  
 Akt [Ser181] [104x # IR-20-800 #0005998]  
 Akt [Ser181] [104y # IR-20-800 #0005999]  
 Akt [Ser181] [104z # IR-20-800 #0006000]  
 Akt [Ser181] [104aa # IR-20-800 #0006001]  
 Akt [Ser181] [104ab # IR-20-800 #0006002]  
 Akt [Ser181] [104ac # IR-20-800 #0006003]  
 Akt [Ser181] [104ad # IR-20-800 #0006004]  
 Akt [Ser181] [104ae # IR-20-800 #0006005]  
 Akt [Ser181] [104af # IR-20-800 #0006006]  
 Akt [Ser181] [104ag # IR-20-800 #0006007]  
 Akt [Ser181] [104ah # IR-20-800 #0006008]  
 Akt [Ser181] [104ai # IR-20-800 #0006009]  
 Akt [Ser181] [104aj # IR-20-800 #0006010]

**A**

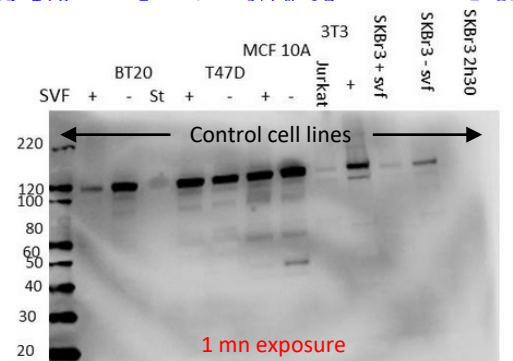

# Data normalization

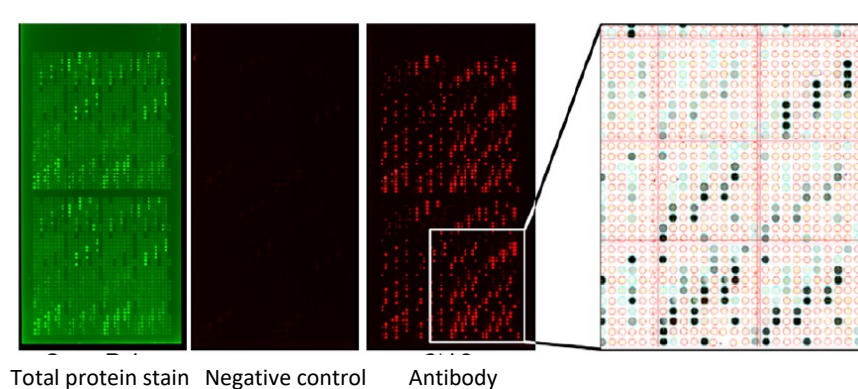

After normalization, there is still variability between samples

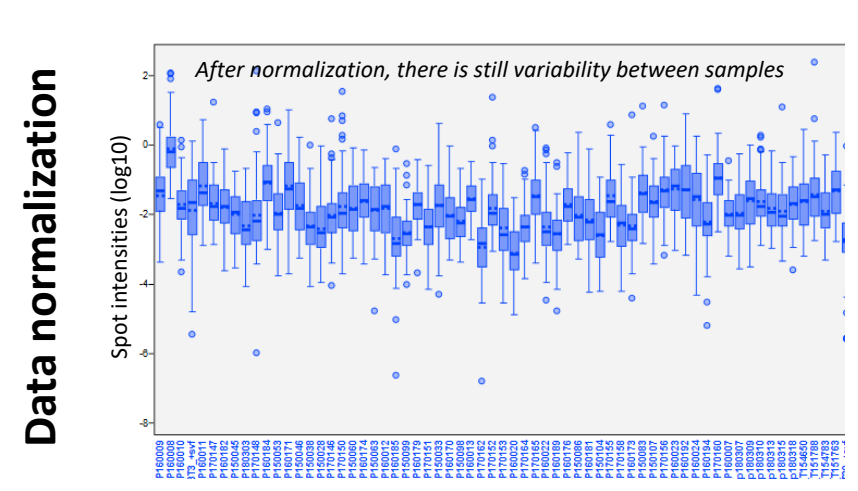

Centering allows to align samples around their median

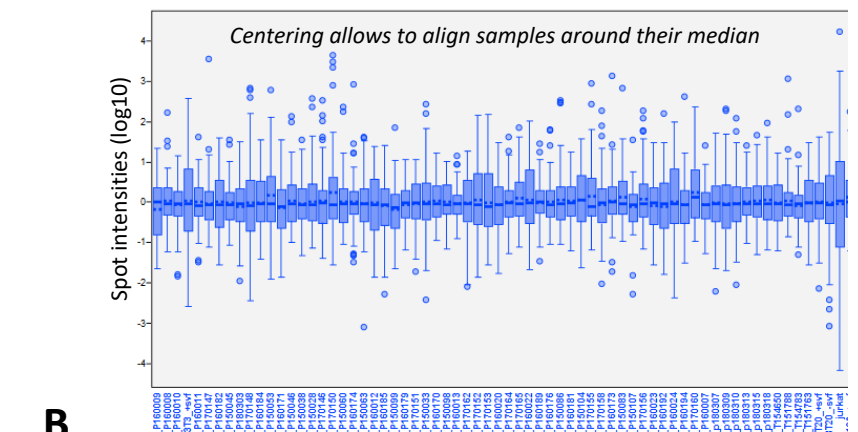

**B**

# Exploratory RPPA analyses

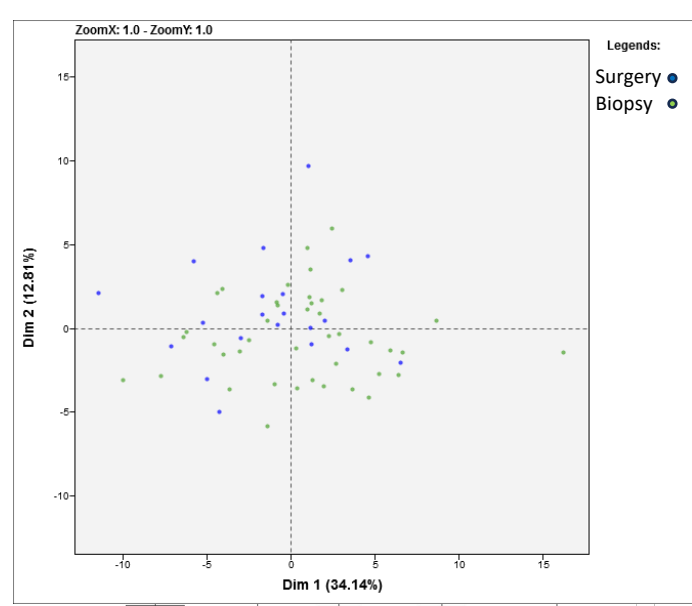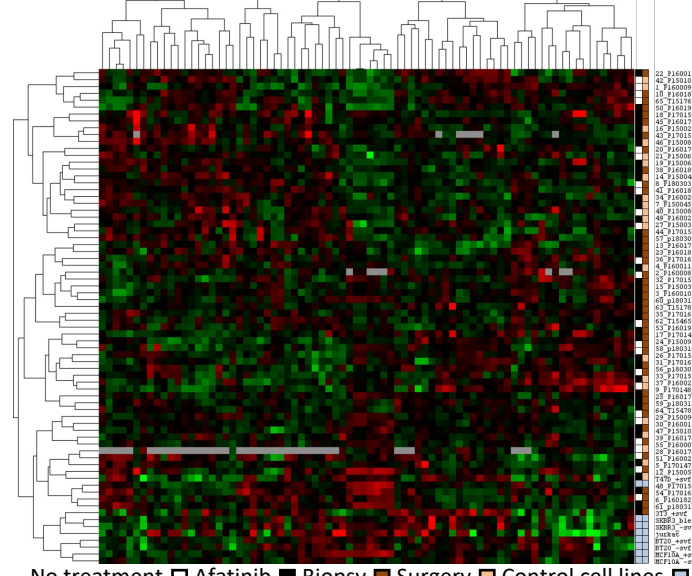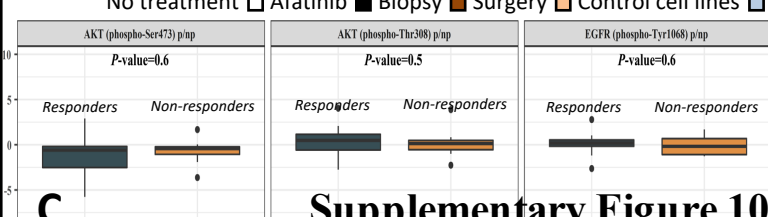

**C**

Supplementary Figure 10
